# Supplementary material
Source: PubMed Central journal article supplement (PMC6033268)
Supplement: NIHMS976747-supplement-supplement_1.pdf [file NIHMS976747-supplement-supplement_1.pdf]

**Supplementary Table S1:** Primer sequences used for cloning antigen into pET-21b bacterial expression vector

| <b>Primer</b>             | <b>Sequence</b>                                                                                                                      | <b>Antigen cloned and sequenced</b>                |
|---------------------------|--------------------------------------------------------------------------------------------------------------------------------------|----------------------------------------------------|
| T7 Clon (for)             | 5'CGCCGCCGCGGATCCGCGACGCGTCGACCATCATCATCATCATATG<br>GCTAGCATGACTGGTGGACAGCAAATG 3'                                                   | 4B7, 5H6, T7 1-2a (cloned)                         |
| T7 NdeI Clon For          | 5'ATAGAATCACATTAACAGGAATTCCATATGGAATTCCATCATCATCATCA<br>TCATGGTGTATGGCTAGCATGACTGGTGGACAGCAAATG 3'                                   | 4H4 (cloned)                                       |
| T7 reverse primer         | 5'CCTCCTTTTCAGCAAAAAACCCC 3'                                                                                                         | 4B7, 4H4, 5H6 (cloned)                             |
| T7Select seq primer (for) | 5' TGCTAAGGACAACGTTATCGG3'                                                                                                           | 4B7, 4H4, 5H6, T7 1-2a<br>(sequenced)              |
| New pET T7 Prom Seq       | 5' AGATCTCGATCCCGCGAAATTAATACGACTCACTATAGGG 3'                                                                                       | 4B7, 4H4, 5H6, Ro52, CDR2, T7 1-<br>2a (sequenced) |
| CDR2-NdeI-For             | 5'ATCACATTAACAGGAATTCCATATGGAATTCCATCATCATCATCATCATG<br>GTGTTATGGCTAGCATGACTGGTGGACAGCAAATGGGTGGGATGCTGGCG<br>GAAAACCTGGTAGAGGAGT 3' | CDR2 (cloned)                                      |
| CDR2-Xho I Rev:           | 5'CGCGGATCCCGCTCGAGCGGTAGAGCTAGAGGTTCAATTAAGAATGAGA<br>GGAGAGTGATC 3'                                                                | CDR2 (cloned)                                      |
| CDR2-Seq                  | 5' AGGAATATGGGCTCGTGTTAAAGGAGAACAGTGAAC 3'                                                                                           | CDR2 (sequenced)                                   |
| Ro52-Sall For             | 5'CGCCGCCGCGGATCCGCGACGCGTCGACCATCATCATCATCATATG<br>GCTTCAGCAGCACGCTTGACAATGATGTGGGAGG 3'                                            | Ro52 (cloned)                                      |
| Ro52-XhoI Rev             | 5'CGCGGATCCCGCTCGAGCGGCCATCAATAGTCAGTGGATCCTTGTGATC<br>CAATA 3'                                                                      | Ro52 (cloned)                                      |
| Ro52-Seq                  | 5' TCCATGCCAAGTTGGGATTTTCCTGGACTATGAGGCTGGCAT 3'                                                                                     | Ro52 (sequenced)                                   |

**Supplementary Table S2: Demographics of 21 ovarian cancer patients used in the test set**

| StudyID | Age at Dx | BSID  | DxStageCd | TumorClass | TumorGrade            | DFI   | OS | TTR1  | RecurInterval | Chemo            | CA125Recode | DxInterval | EvidenceofDiseaseCd  |
|---------|-----------|-------|-----------|------------|-----------------------|-------|----|-------|---------------|------------------|-------------|------------|----------------------|
| P283    | 51        | 4680  | 3C        | Serous     | Grade 3 (high)        | 11.63 | 82 | 18.27 | -18.27        | pre chemo        | 2393        | 0.00       | EOD                  |
|         |           | 5110  |           |            | Poorly differentiated |       |    |       | -13.60        | in chemo         | 22          | 4.67       | Not Specified        |
|         |           | 12322 |           |            |                       |       |    |       | 1.67          | recur post chemo | 95          | 19.93      | Not Specified        |
| P295    | 71        | 5042  | 4         | Serous     |                       | 5.83  | 32 | 10.67 | -10.67        | pre chemo        | 388         | 0.00       | EOD                  |
|         |           | 7183  |           |            |                       |       |    |       | -5.77         | post chemo       | 18          | 4.90       | NED                  |
|         |           | 12269 |           |            |                       |       |    |       | 3.97          | recur in chemo   | 64          | 14.63      | Not Specified        |
| P336    | 60        | 12563 | 3C        | Serous     | Grade 3 (high)        | 15.10 | 85 | 20.30 | -20.23        | pre chemo        | 1185        | 0.07       | EOD                  |
|         |           | 12912 |           |            | Poorly differentiated |       |    |       | -10.00        | post chemo       | 20          | 10.30      | NED                  |
|         |           | 15164 |           |            |                       |       |    |       | 23.67         | recur pre chemo  | 185         | 43.97      | EOD                  |
| P341    | 40        | 12671 | 3C        | Serous     | Grade 3 (high)        | 0.57  | 38 | 14.60 | -14.50        | pre chemo        | 1246        | 0.10       | EOD                  |
|         |           | 12897 |           |            | Poorly differentiated |       |    |       | -7.10         | in chemo         | 37          | 7.50       | Not Specified        |
|         |           | 13555 |           |            |                       |       |    |       | 3.17          | in chemo         | 87          | 17.77      | Not Specified        |
| P300    | 69        | 7174  | 3C        | Serous     | Grade 3 (high)        | 4.90  | 65 | 10.17 | -10.17        | pre chemo        | 1226        | 0.00       | EOD                  |
|         |           | 11499 | 3C        |            | Poorly differentiated |       |    |       | -3.73         | post chemo       | 12          | 6.43       | NED                  |
|         |           | 12359 | 3C        |            |                       |       |    |       | 4.50          | recur in chemo   | 246         | 14.67      | Not Specified        |
| P326    | 77        | 12380 | 3C        | Serous     | Moderately to         | 10.13 | 36 | 16.27 | -16.23        | pre chemo        | 1012        | 0.03       | EOD                  |
|         |           | 12898 | 3C        |            | poorly differentiated |       |    |       | -4.30         | in chemo         | 41          | 11.97      | Stable Disease       |
|         |           | 13541 | 3C        |            |                       |       |    |       | 3.43          | recur in chemo   | 115         | 19.70      | Tolerating treatment |
| P342    | 60        | 12675 | 3C        | Serous     | Grade 3 (high)        | 3.20  | 19 | 7.67  | -7.63         | pre chemo        | 182         | 0.03       | EOD                  |
|         |           | 12863 | 3C        |            | Poorly differentiated |       |    |       | -3.30         | in chemo         | 5           | 4.37       | NED                  |
|         |           | 12908 | 3C        |            |                       |       |    |       | 0.90          | in chemo         | 34          | 8.57       | Not Specified        |
|         |           | 13507 | 3C        |            |                       |       |    |       | 6.03          | in chemo         | 228         | 13.70      | EOD                  |

|      |    |       |    |        |                       |       |    |       |        |                  |       |       |                      |
|------|----|-------|----|--------|-----------------------|-------|----|-------|--------|------------------|-------|-------|----------------------|
| P356 | 44 | 12867 | 3C | Serous | Grade 3 (high)        | 9.07  | 39 | 13.77 | -13.70 | pre chemo        | 542   | 0.07  | EOD                  |
|      |    | 12920 | 3C |        | Poorly differentiated |       |    |       | -9.07  | in chemo         | 11    | 4.70  | Tolerating treatment |
|      |    | 13549 | 3C |        |                       |       |    |       | -1.63  | post chemo       | 89    | 12.13 | EOD                  |
| P367 | 49 | 13606 | 4  | Serous | nd                    | 4.33  | 19 | 10.90 | -10.90 | pre chemo        | 788   | 0.00  | EOD                  |
|      |    | 14698 | 4  |        |                       |       |    |       | -4.33  | in chemo         | 29    | 6.57  | Tolerating treatment |
|      |    | 14893 | 4  |        |                       |       |    |       | 2.20   | recur in chemo   | 3084  | 13.10 | EOD                  |
| P370 | 59 | 13615 | 3C | Serous | Grade 3 (high)        | 2.63  | 32 | 8.03  | -8.03  | pre chemo        | 1200  | 0.00  | EOD                  |
|      |    | 14697 | 3C |        | Poorly differentiated |       |    |       | -2.63  | in chemo         | 13    | 5.40  |                      |
|      |    | 14832 | 3C |        |                       |       |    |       | 2.50   | recur in chemo   | 300   | 10.53 | EOD                  |
| P178 | 35 | 887   | 3C | Serous | Grade 3 (high)        | 3.50  | 34 | 9.83  | -9.80  | pre chemo        | 16906 | 0.03  | EOD                  |
|      |    | 1667  | 3C |        | Poorly differentiated |       |    |       | -4.20  | in chemo         | 203   | 5.63  | NED                  |
|      |    | 3817  | 3C |        |                       |       |    |       | 1.57   | recur in chemo   | 506   | 11.40 | EOD                  |
| P378 | 49 | 14828 | 4A | Serous | Grade 3 (high)        | 11.67 | 61 | 28.27 | -28.27 | pre chemo        | 1725  | 0.00  | EOD                  |
|      |    | 15180 | 4A |        | Poorly differentiated |       |    |       | -12.37 | in chemo         | 9     | 15.90 | Not Specified        |
|      |    | 15281 | 4A |        |                       |       |    |       | -1.87  | post chemo       | 60    | 26.40 | Not Specified        |
| P392 | 47 | 15175 | 3C | Serous | Grade 3 (high)        | 8.53  | 28 | 13.67 | -13.67 | pre chemo        | 13154 | 0.00  | EOD                  |
|      |    | 15256 | 3C |        | Poorly differentiated |       |    |       | -5.93  | post chemo       | 9     | 7.73  | NED                  |
|      |    | 15292 | 3C |        |                       |       |    |       | 0.37   | recur in chemo   | 60    | 14.03 | EOD                  |
| P393 | 67 | 15190 | 3C | Serous | Grade 3 (high)        | 4.10  | 29 | 12.07 | -11.10 | pre chemo        | 4040  | 0.97  |                      |
|      |    | 15259 | 3C |        | Poorly differentiated |       |    |       | -5.03  | in chemo         | 26    | 7.03  | EOD                  |
|      |    | 15291 | 3C |        |                       |       |    |       | 0.23   | recur pre chemo  | 3500  | 12.30 | EOD                  |
| P265 | 49 | 4347  | 3C | Serous | Grade 3 (high)        | 4.87  | 24 | 9.50  | -9.53  | pre chemo        | 2693  | -0.03 | EOD                  |
|      |    | 4694  | 3C |        | Poorly differentiated |       |    |       | -4.87  | in chemo         | 54    | 4.63  | Not Specified        |
|      |    | 5109  | 3C |        |                       |       |    |       | -0.43  | recur post chemo | 204   | 9.07  | Not Specified        |
| P386 | 56 | 15155 | 3C | Serous | Grade 3 (high)        | 16.80 | 52 | 22.73 | -22.73 | pre chemo        | 584   | 0.00  |                      |

|      |    |       |    |        |                       |       |    |       |  |        |                 |      |       |               |
|------|----|-------|----|--------|-----------------------|-------|----|-------|--|--------|-----------------|------|-------|---------------|
|      |    | 15178 | 3C |        | Poorly differentiated |       |    |       |  | -17.27 | in chemo        | 16   | 5.47  | Not Specified |
|      |    | 15251 | 3C |        |                       |       |    |       |  | -10.50 | post chemo      | 14   | 12.23 | NED           |
|      |    | 15769 | 3C |        |                       |       |    |       |  | 1.17   | recur in chemo  | 166  | 23.90 | EOD           |
|      |    |       |    |        |                       |       |    |       |  |        |                 |      |       |               |
| P410 | 62 | 15260 | 3C | Serous | Grade 3 (high)        | 8.13  | 45 | 14.77 |  | -14.77 | pre chemo       | 3643 | 0.00  | EOD           |
|      |    | 15776 | 3C |        | Poorly differentiated |       |    |       |  | -3.23  | post chemo      | 24   | 11.53 | NED           |
|      |    | 15796 | 3C |        |                       |       |    |       |  | 1.20   | recur in chemo  | 568  | 15.97 | Not Specified |
|      |    |       |    |        |                       |       |    |       |  |        |                 |      |       |               |
| P413 | 55 | 15272 | 3C | Serous | Grade 3 (high)        | 7.83  | 48 | 24.53 |  | -24.50 | pre chemo       | 3217 | 0.03  | EOD           |
|      |    | 15770 | 3C |        | Poorly differentiated |       |    |       |  | -15.53 | in chemo        | 8    | 9.00  | Not Specified |
|      |    | 15792 | 3C |        |                       |       |    |       |  | -10.87 | in chemo        | 7    | 13.67 | NED           |
|      |    |       |    |        |                       |       |    |       |  |        |                 |      |       |               |
| P376 | 57 | 14822 | 3C | Serous | Grade 3 (high)        | 17.27 | 61 | 34.33 |  | -34.47 | pre chemo       | 1619 | -0.13 | EOD           |
|      |    | 15264 | 3C |        | Poorly differentiated |       |    |       |  | -9.93  | post chemo      | 7    | 24.40 | NED           |
|      |    | 15740 | 3C |        |                       |       |    |       |  | -0.73  | post chemo      | 10   | 33.60 | EOD           |
|      |    |       |    |        |                       |       |    |       |  |        |                 |      |       |               |
| P398 | 72 | 15226 | 3C | Serous | Grade 3 (high)        | 8.67  | 25 | 15.20 |  | -15.20 | pre chemo       | 120  | 0.00  | EOD           |
|      |    | 15266 | 3C |        | Poorly differentiated |       |    |       |  | -10.30 | in chemo        | 24   | 4.90  | EOD           |
|      |    | 15781 | 3C |        |                       |       |    |       |  | 1.87   | recur in chemo  | 38   | 17.07 | EOD           |
|      |    |       |    |        |                       |       |    |       |  |        |                 |      |       |               |
| P400 | 47 | 15229 | 3C | Serous | Grade 3 (high)        | 4.27  | 19 | 9.63  |  | -9.63  | pre chemo       | 8658 | 0.00  | EOD           |
|      |    | 15274 | 3C |        | Poorly differentiated |       |    |       |  | -4.50  | in chemo        | 6    | 5.13  | Not Specified |
|      |    | 15659 | 3C |        |                       |       |    |       |  | 0.17   | recur pre chemo | 106  | 9.80  | EOD           |

Note: Average age of onset = 56 years, range 35-79

Average TTR = 15.48 months, range 7.7-34.3

Average DFI (interval between date of last chemo and recurrence) = 7.76 months (range 0.57-17.27)

antigen that is shown on the western blot image at time T2 shows that the normalized signal intensity for that particular antigen is above its cutoff. Underneath each western blot images in a panel, the normalized signal intensity value of each protein band is shown.

**Fig. 2. Determination of sensitivity of different combination of antigens for predicting ovarian cancer recurrence using venn diagram.** Venn diagrams represented the immunoreactivity of each antigen (above its cutoff) with ovarian cancer patient's serum sample obtained at time T2 (the blood sample collected approximately 3-15 months before the clinical recurrence, ideally with normal CA125 and no evidence of disease). Panels (A-B) represent venn diagram of different combination of antigens, Ro52, CDR2 and 5H6 (A), and Ro52, HARS, and CDR2 (B) used for determining sensitivity for predicting ovarian cancer recurrence.

**Supplementary Fig. 1. Western blot and graphical representation of difference in immunoreactivity of Ro52 protein with serum IgGs using varying amounts of Ro52 protein.** Varying amounts of Ro52, such as 0.3  $\mu$ g, 0.15  $\mu$ g and 0.06  $\mu$ g were loaded and SDS-PAGE followed by immunoscreening using serum samples obtained from 1 ovarian cancer patient (A) and a women with benign disease (B) was performed using western blot as described in figure legend 1 (Fig. 1). Supplementary Fig. 1C is a graphical representation of difference in immunoreactivity of Ro52 antigen with ovarian cancer patient P203-3B-4066 and women with benign disease B249-1B-4323 using varying amounts of Ro52 protein. This is utilized to choose the optimum amount of Ro52 protein in

micrograms for which the signal intensity of the Ro52 protein band remained within the detectable range when measured with Odyssey software.

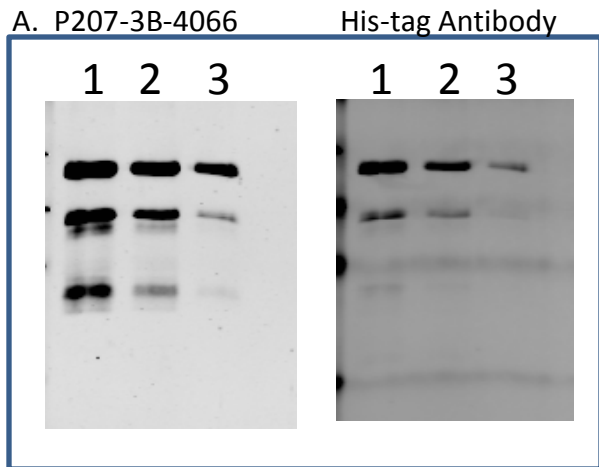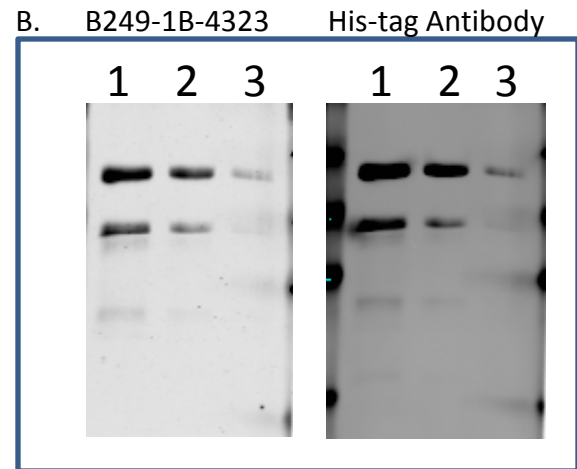

| Lane number              | 1           | 2            | 3            |
|--------------------------|-------------|--------------|--------------|
| Ro52 protein (57.06 kDa) | 0.3 $\mu$ g | 0.15 $\mu$ g | 0.06 $\mu$ g |

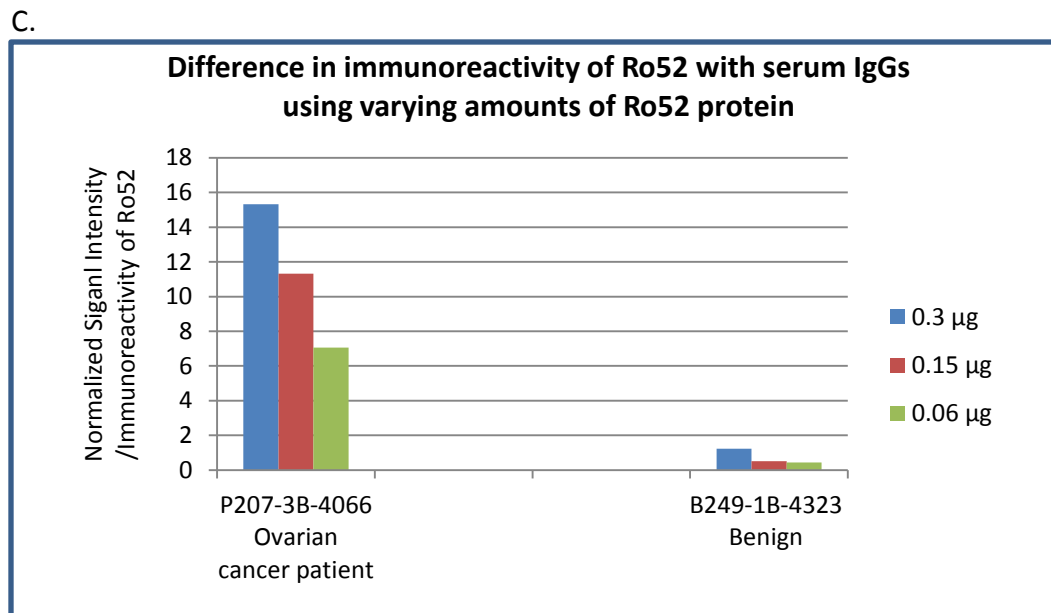

**Supplementary Figure 1(A-C)**
